# Supplementary material
Source: PubMed Central journal article supplement (PMC2532803)
Supplement: blood-2007-12-128843_2.pdf [file blood-2007-12-128843_2.pdf]

| Patient        | PCR (TCR $\gamma$ ) |                                               | Flow cytometry |                                              |
|----------------|---------------------|-----------------------------------------------|----------------|----------------------------------------------|
|                | # PCR products      | # T-cell clones<br>Minimum (m)    Maximum (M) |                | V $\beta$ Spectratyping (CD8) **             |
| A              | 3                   | 2                                             | 3              | Clonal (V $\beta$ 8; 86%)                    |
| B              | 2                   | 1                                             | 2              | Clonal (V $\beta$ 17; 98%)                   |
| D <sup>†</sup> | 3                   | 2                                             | 3              | Oligoclonal <sup>‡</sup> (V $\beta$ 14; 46%) |
| F              | 2                   | 1                                             | 2              | Oligoclonal <sup>‡</sup> (V $\beta$ 2; 68%)  |
| G              | 7                   | 4                                             | 7              | Oligoclonal (V $\beta$ 16; 16%)              |
| H              | 2                   | 1                                             | 2              | Oligoclonal (V $\beta$ 8; 16%)               |
| I              | 3                   | 2                                             | 3              | NA <sup>§</sup>                              |

<sup>\*</sup> The maximum number of T-cell clones (M) assumes rearrangement of one TCR $\gamma$  allele in each clone, whereas the minimum number (m) assumes that both TCR $\gamma$  alleles are rearranged in all clones (if m is even) or in m-1 clones (if m is odd)

<sup>\*\*</sup> The dominant V $\beta$  clone and the percent of all CD8+ cells expressing this clone in the cell population tested are indicated in parentheses

<sup>†</sup> The cell population tested for this patient contained a mixture of two limiting dilution T-cell products

<sup>‡</sup> Oligoclonal pattern including one prominent clone and several smaller clones

<sup>§</sup> Uninterpretable (high background)
