# Supplementary material
Source: PubMed Central journal article supplement (PMC2532803)
Supplement: blood-2007-12-128843_3.pdf [file blood-2007-12-128843_3.pdf]

| Timepoint                                  | Patient A<br>(cells/ $\mu$ l) | Patient B<br>(cells/ $\mu$ l) | Patient D<br>(cells/ $\mu$ l) | Patient F<br>(cells/ $\mu$ l) | Patient G<br>(cells/ $\mu$ l) | Patient H<br>(cells/ $\mu$ l) | Patient I<br>(cells/ $\mu$ l) |
|--------------------------------------------|-------------------------------|-------------------------------|-------------------------------|-------------------------------|-------------------------------|-------------------------------|-------------------------------|
| Study Entry                                | 46                            | 35                            | 1                             | 62                            | 320                           | 1855                          | 88                            |
| Baseline <sup>A</sup>                      | 8                             | 3                             | 81                            | 16                            | 746                           | 1                             | 40                            |
| 24 h after<br>final T-cell<br>infusion     | 11                            | 5                             | 39                            | 47                            | 393                           | 4                             | 18                            |
| 1 month<br>after final T-<br>cell infusion | 26                            | 99                            | 43                            | 122                           | 596                           | 45                            | 154                           |

<sup>A</sup> After cytoreductive chemotherapy, immediately before the first T-cell infusion
