# Supplementary material
Source: PubMed Central journal article supplement (PMC2532803)
Supplement: blood-2007-12-128843_4.pdf [file blood-2007-12-128843_4.pdf]

| Timepoint                                  | Patient A<br>(cells/ $\mu$ l) | Patient B<br>(cells/ $\mu$ l) | Patient D<br>(cells/ $\mu$ l) | Patient F<br>(cells/ $\mu$ l) | Patient G<br>(cells/ $\mu$ l) | Patient H<br>(cells/ $\mu$ l) | Patient I<br>(cells/ $\mu$ l) |
|--------------------------------------------|-------------------------------|-------------------------------|-------------------------------|-------------------------------|-------------------------------|-------------------------------|-------------------------------|
| Study Entry                                | 985                           | 181                           | 516                           | 641                           | 790                           | 625                           | 380                           |
| Baseline <sup>A</sup>                      | 1084                          | 280                           | 454                           | 181                           | 1170                          | 407                           | 300                           |
| 24 h after<br>final T-cell<br>infusion     | 818                           | 203                           | 280                           | 42                            | 1096                          | 146                           | 47                            |
| 1 month<br>after final T-<br>cell infusion | 856                           | 445                           | 296                           | 306                           | 1631                          | 461                           | 434                           |

<sup>A</sup> After cytoreductive chemotherapy, immediately before the first T-cell infusion
